# Supplementary material
Source: PubMed Central journal article supplement (PMC7528167)
Supplement: ao0c02382_si_001.pdf [file ao0c02382_si_001.pdf]

# Supporting Information

## Easily construct imine bonded COFs for iodine capture at ambient temperature

Yonghe Sun<sup>a</sup>, Sanan Song<sup>b</sup>, Dehai Xiao<sup>c</sup>, Linfeng Gan<sup>c\*</sup>, Yuanrui Wang<sup>a\*</sup>

<sup>a</sup> Academy of Chemical Engineering, Changchun University of technology,  
Changchun, Jilin 130012, China.

<sup>b</sup> College of Chemistry, Jilin University, Changchun, Jilin 130012, China.

<sup>c</sup> Changchun Institute of Applied Chemistry, Chinese Academy of Sciences,  
Changchun, Jilin 130022, China.

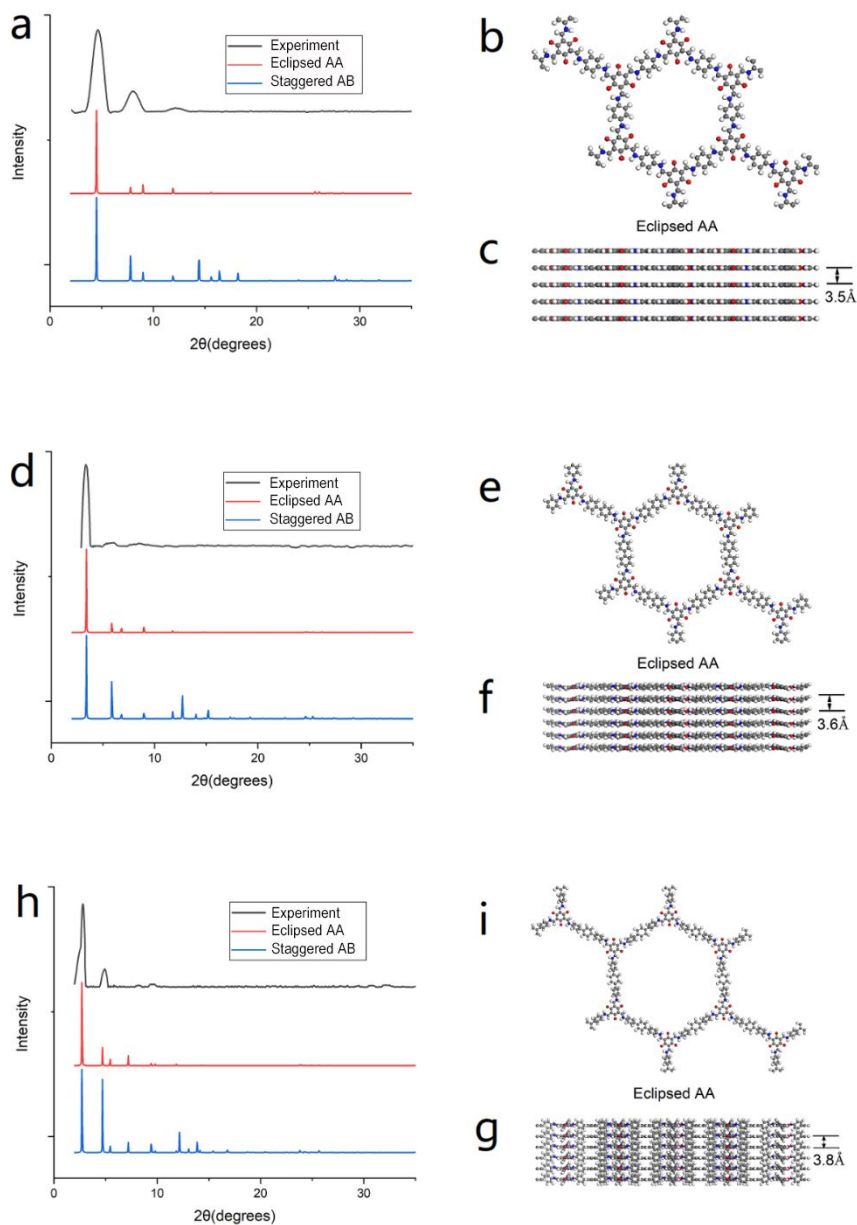

**Figure S1.** PXRD patterns (black, major reflections) and simulations (red and blue) profiles of (a) COF-TpgDB, (b, c) simulational eclipsed structure of COF-TpgDB, (d) PXRD patterns (black, major reflections) and simulations (red and blue) profiles of COF-TpgBD, (e, f) simulational eclipsed structure of COF-TpgBD, (h) PXRD patterns (black, major reflections) and simulations (red and blue) profiles of COF-TpgTd, (i, g) simulational eclipsed structure of COF-

TpgTd.

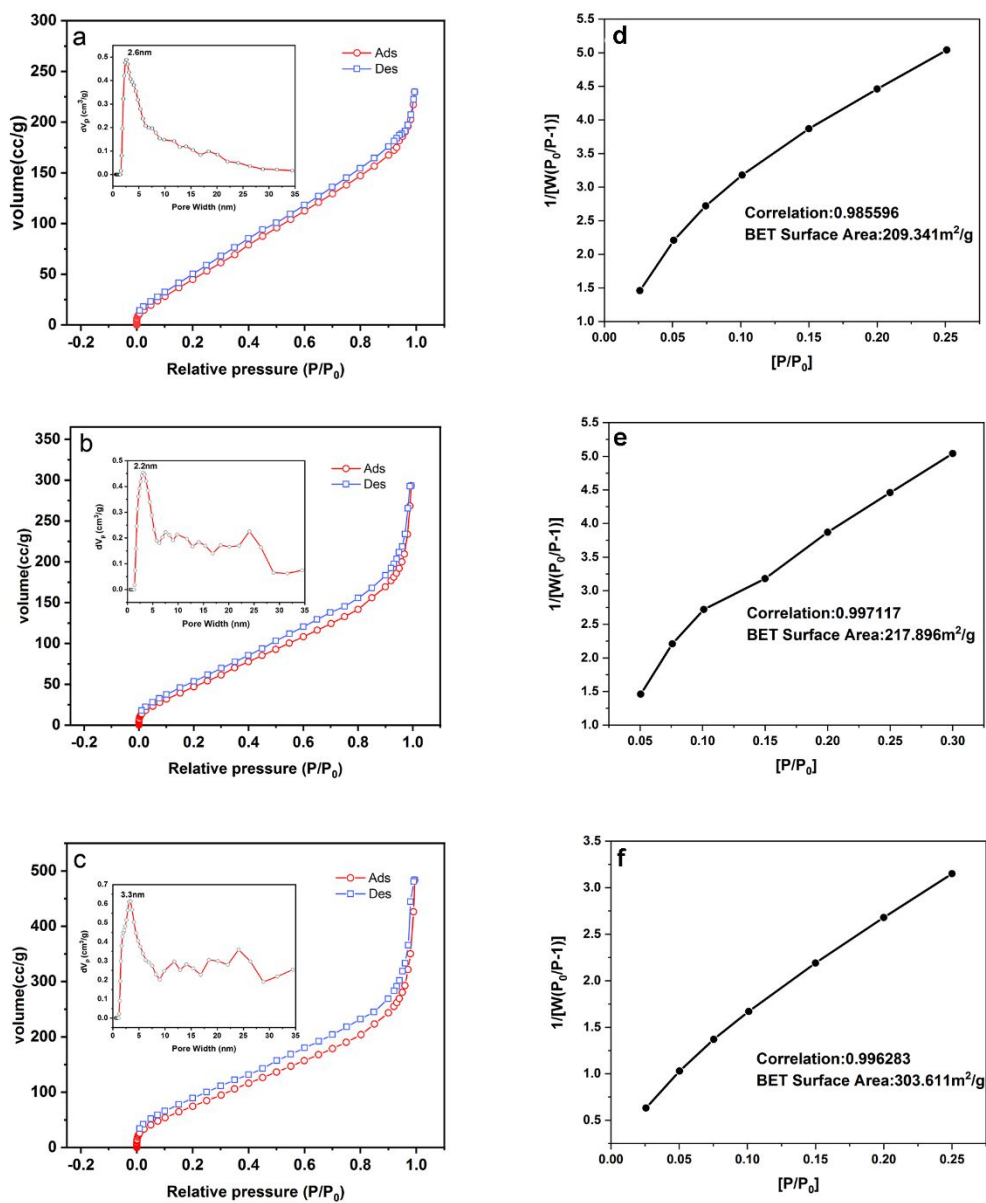

**Figure S2.**  $N_2$  adsorption and desorption isotherms of CCOFs. (a) COF-TpgDB, (b) COF-TpgBD, (c) COF-TpgTd. BET surface area curves for CCOFs calculated from the isotherm. (d) COF-TpgDB, (e) COF-TpgBD, (f) COF-TpgTd.

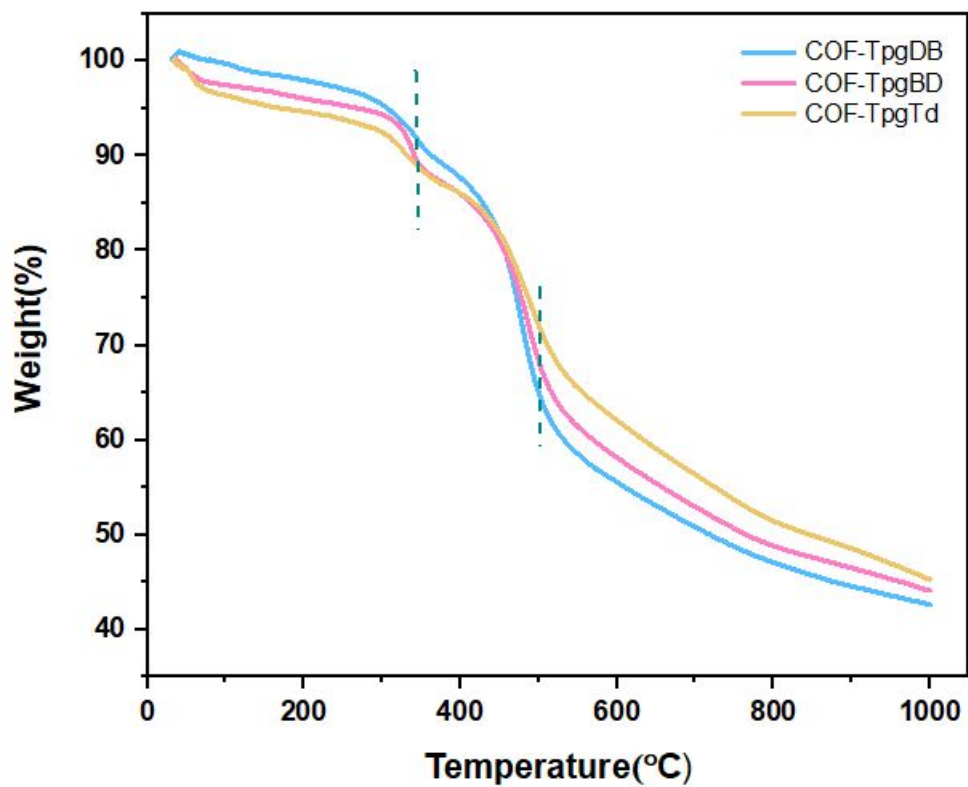

**Figure S3.** Thermogravimetric analysis curve of COFs (a, blue) COF-TpgDB, (b, pink) COF-TpgBD, and (c, orange) COF-TpgTd.

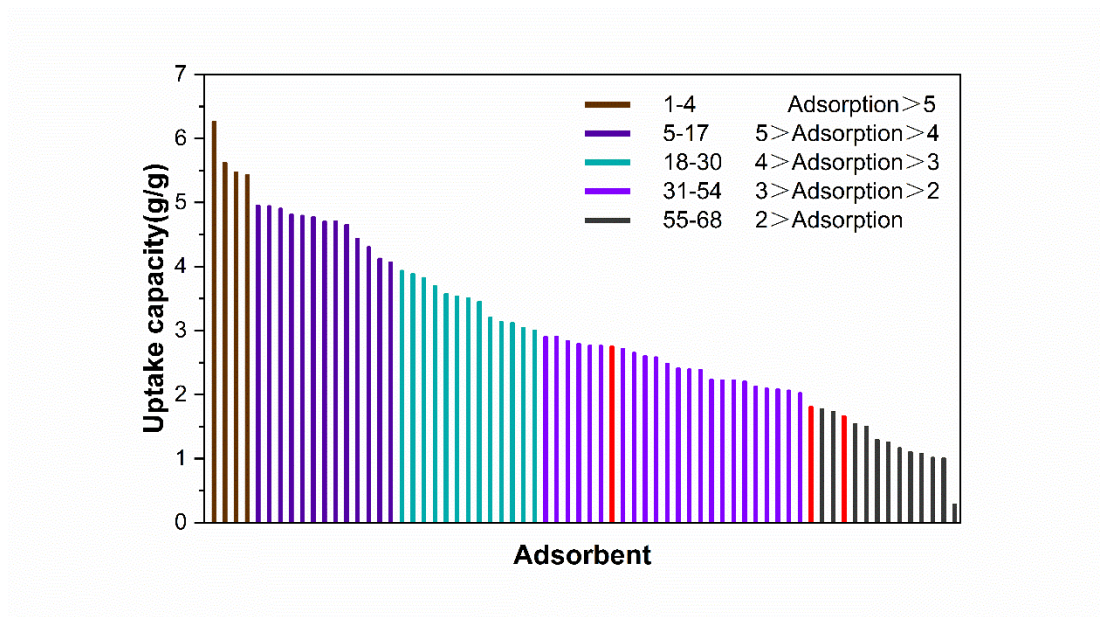

**Figure S4.** Iodine uptake of different adsorbents. The red bars represent the 2D COFs in this work.

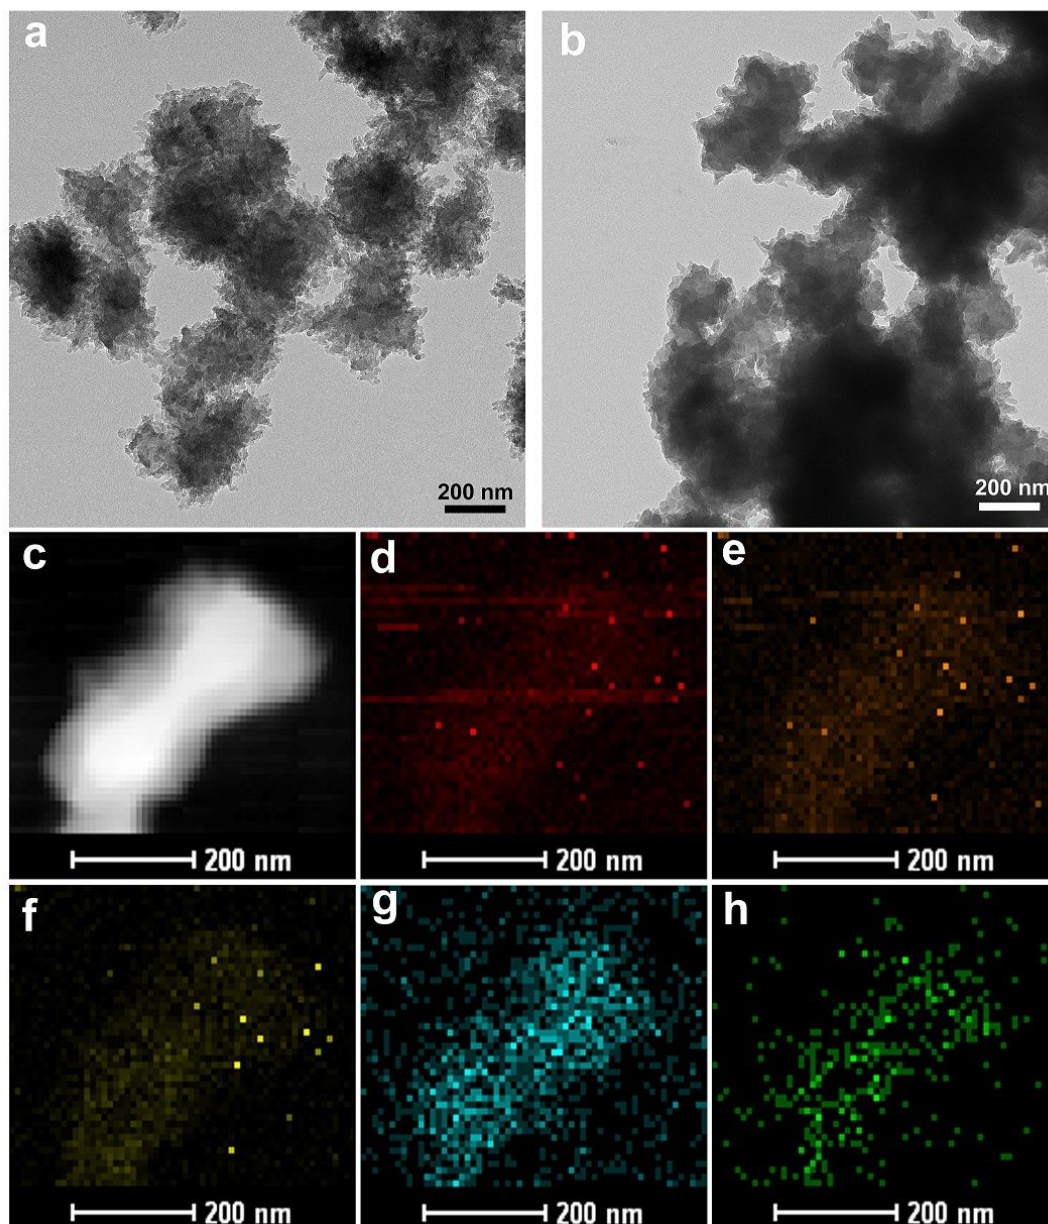

**Figure S5.** TEM images of (a) pristine COF-TpgDB; (b) iodine-laden COF-TpgDB; (c) HAADF-STEM of iodine-laden COF-TpgDB; (d) C-K elemental mapping images of iodine-laden COF-TpgDB; (e) N-K elemental mapping images of iodine-laden COF-TpgDB; (f) O-K elemental mapping images of iodine-laden COF-TpgDB; (g) I-L elemental mapping images of iodine-laden COF-TpgDB; (h) I-K elemental mapping images of iodine-laden COF-TpgDB.

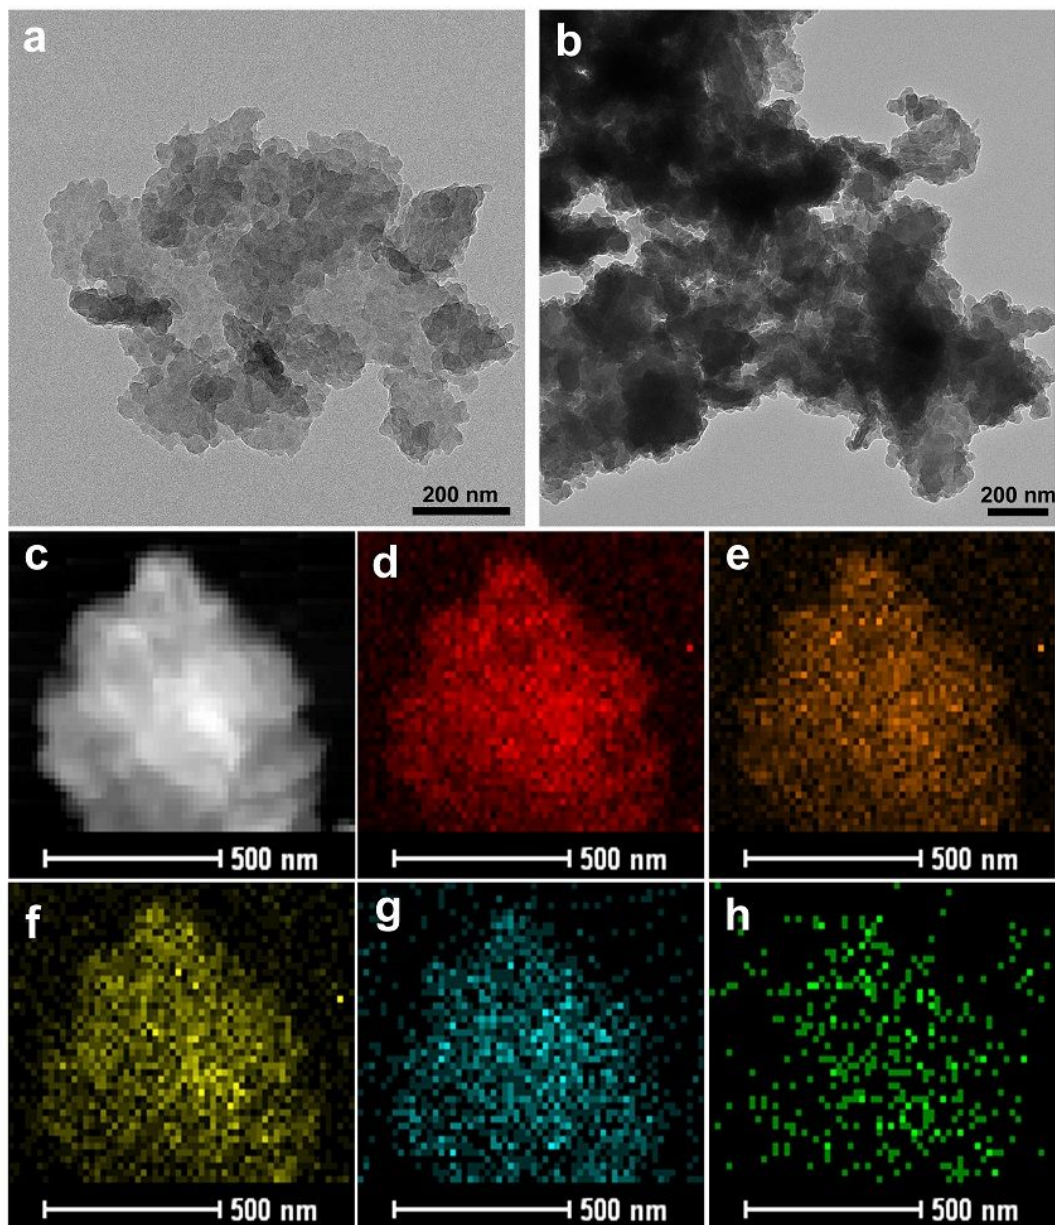

**Figure S6.** TEM images of (a) pristine COF-TpgBD; (b) iodine-laden COF-TpgBD; (c) HAADF-STEM of iodine-laden COF-TpgBD; (d) C-K elemental mapping images of iodine-laden COF-TpgBD; (e) N-K elemental mapping images of iodine-laden COF-TpgBD; (f) O-K elemental mapping images of iodine-laden COF-TpgBD; (g) I-L elemental mapping images of iodine-laden



COF-TpgBD; (h) I-K elemental mapping images of iodine-laden COF-TpgBD.

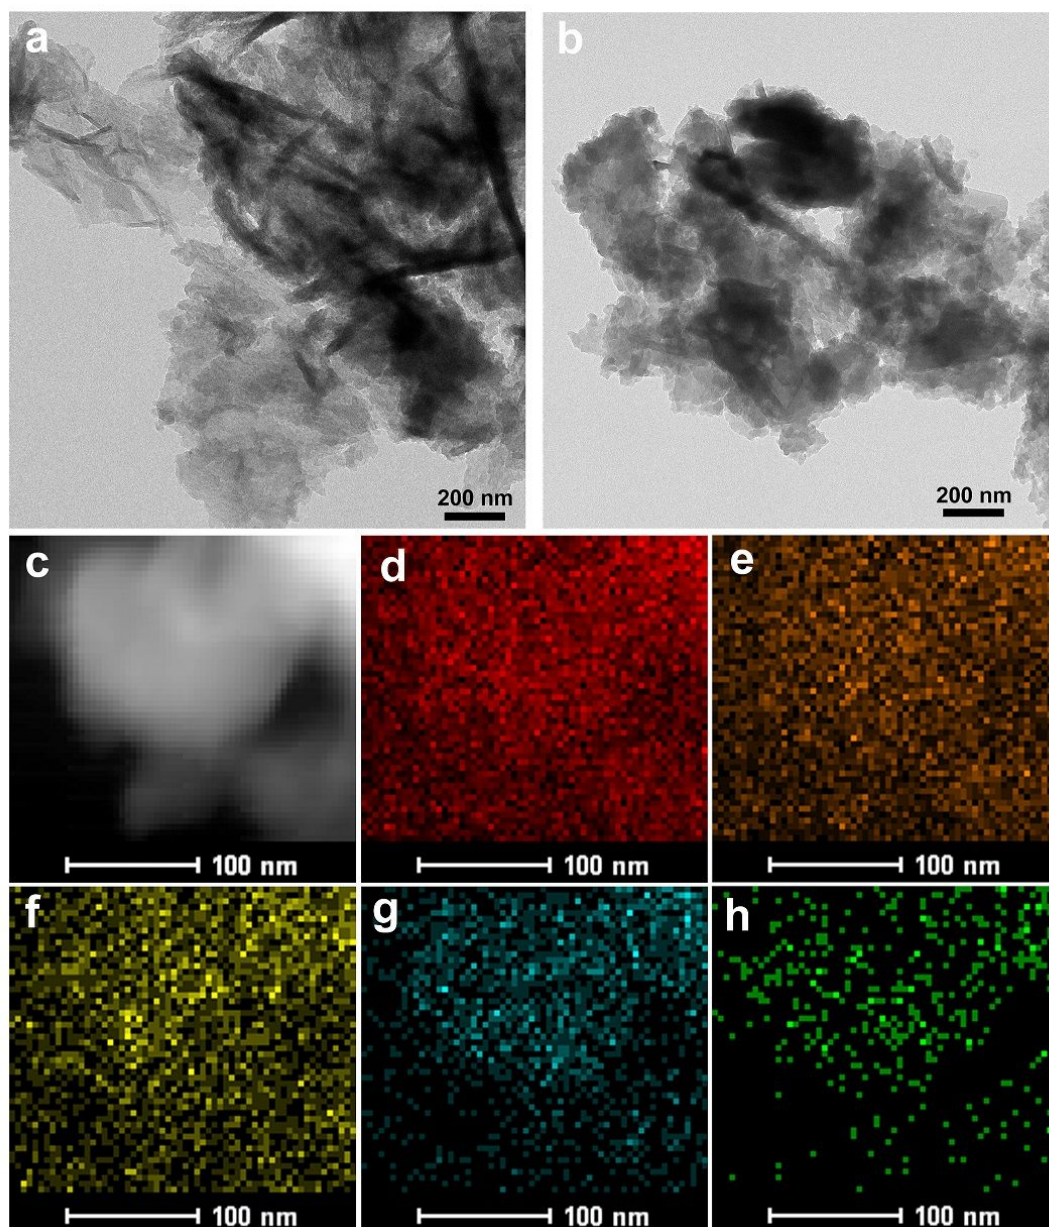

**Figure S7.** TEM images of (a) pristine COF-TpgTd; (b) iodine-laden COF-TpgTd; (c) HAADF-STEM of iodine-laden COF-TpgTd; (d) C-K elemental mapping images of iodine-laden COF-TpgTd; (e) N-K elemental mapping

images of iodine-laden COF-TpgTd; (f) O-K elemental mapping images of iodine-laden COF-TpgTd; (g) I-L elemental mapping images of iodine-laden COF-TpgTd; (h) I-K elemental mapping images of iodine-laden COF-TpgTd.

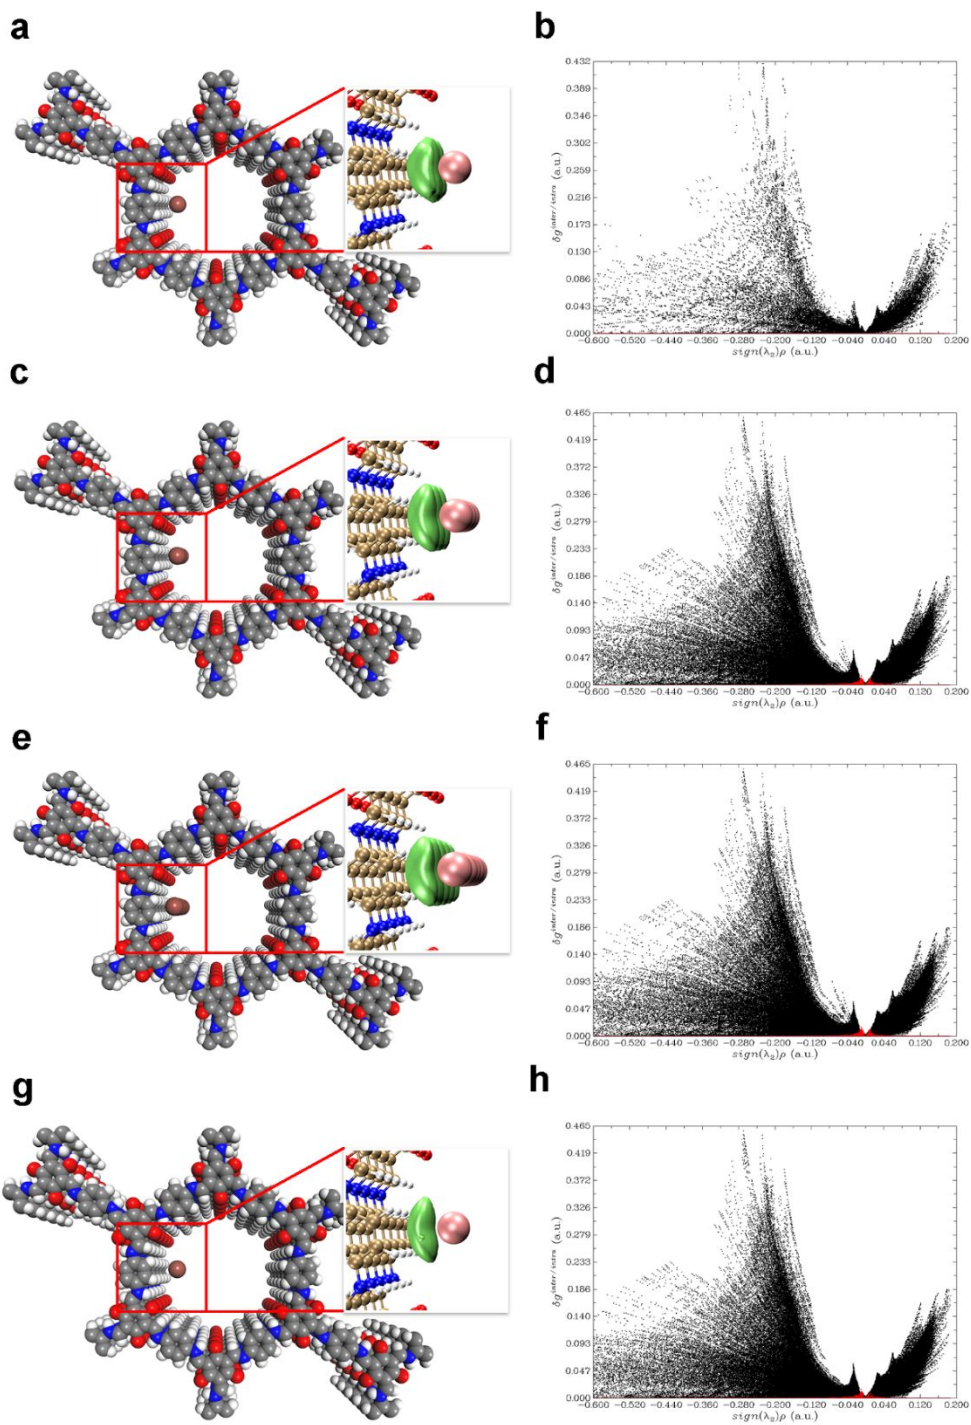

**Figure S8.** Simulated characterization of the iodine species capturing sites (diamine linker, DB) and IGM Scatter plot of COF-TpgDB. (a, b)  $I_2$ ; (c, d)  $I_3^-$ ; (e, f)  $I_5^-$ ; (g, h)  $I^+$ .

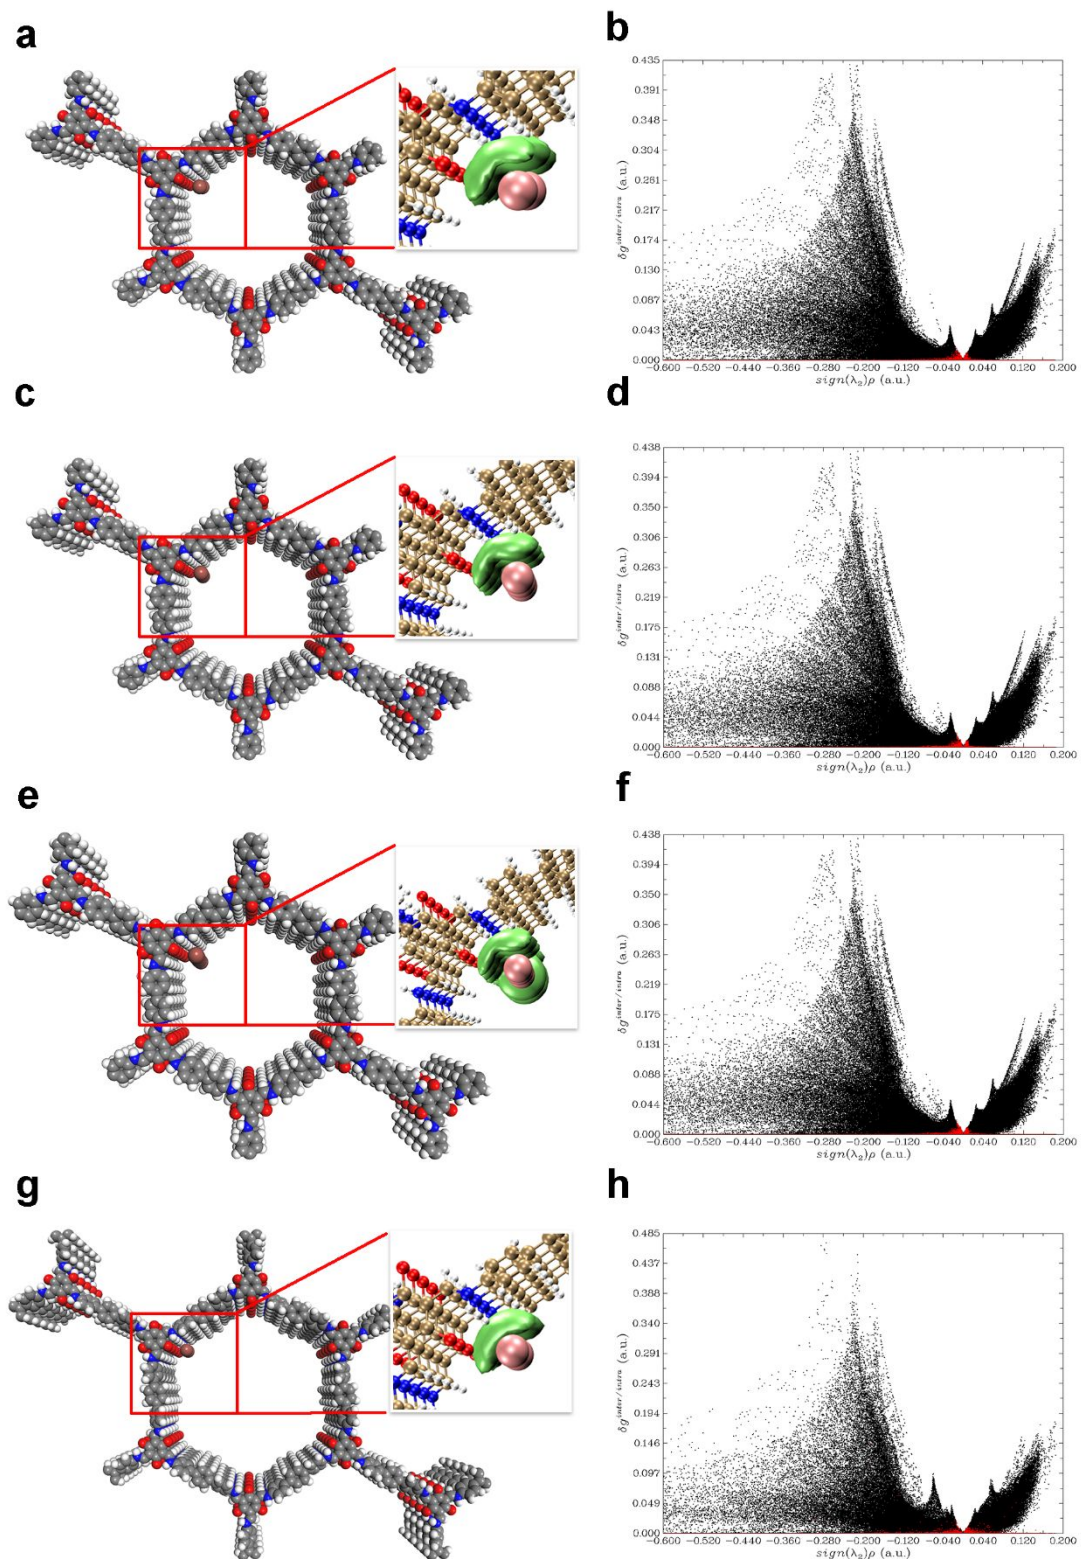

**Figure S9.** Simulated characterization of the iodine species capturing sites (Tpg) and IGM Scatter plot of COF-TpgBD. (a, b)  $I_2$ ; (c, d)  $I_3^-$ ; (e, f)  $I_5^-$ ; (g, h)  $I^+$ .

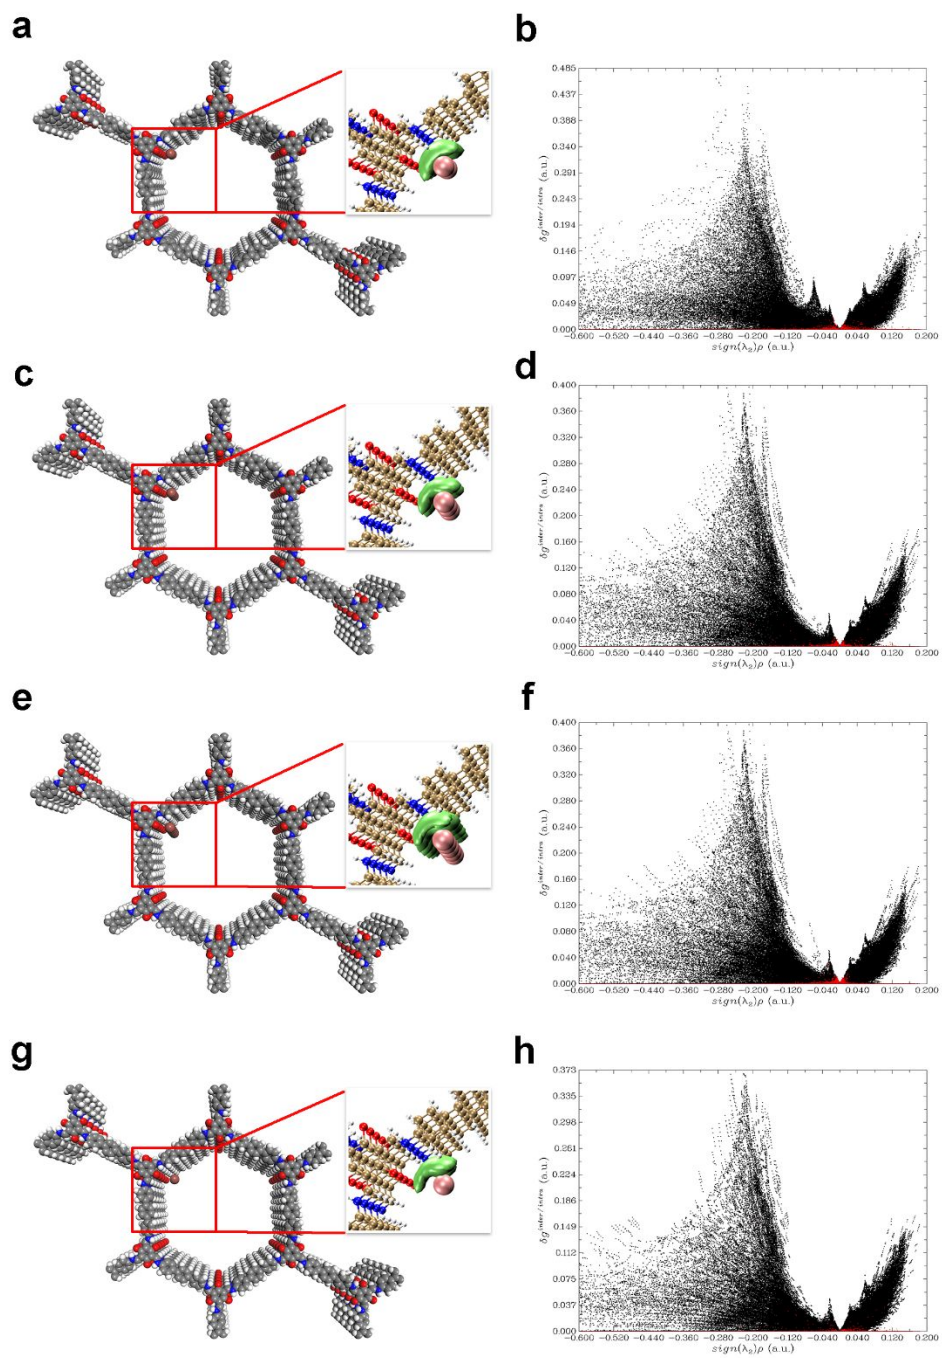

**Figure S10.** Simulated characterization of the iodine species capturing sites (diamine linker, DB) and IGM Scatter plot of COF-TpgBD. (a, b)  $I_2$ ; (c, d)  $I_3^-$ ; (e, f)  $I_5^-$ ; (g, h)  $I^+$ .

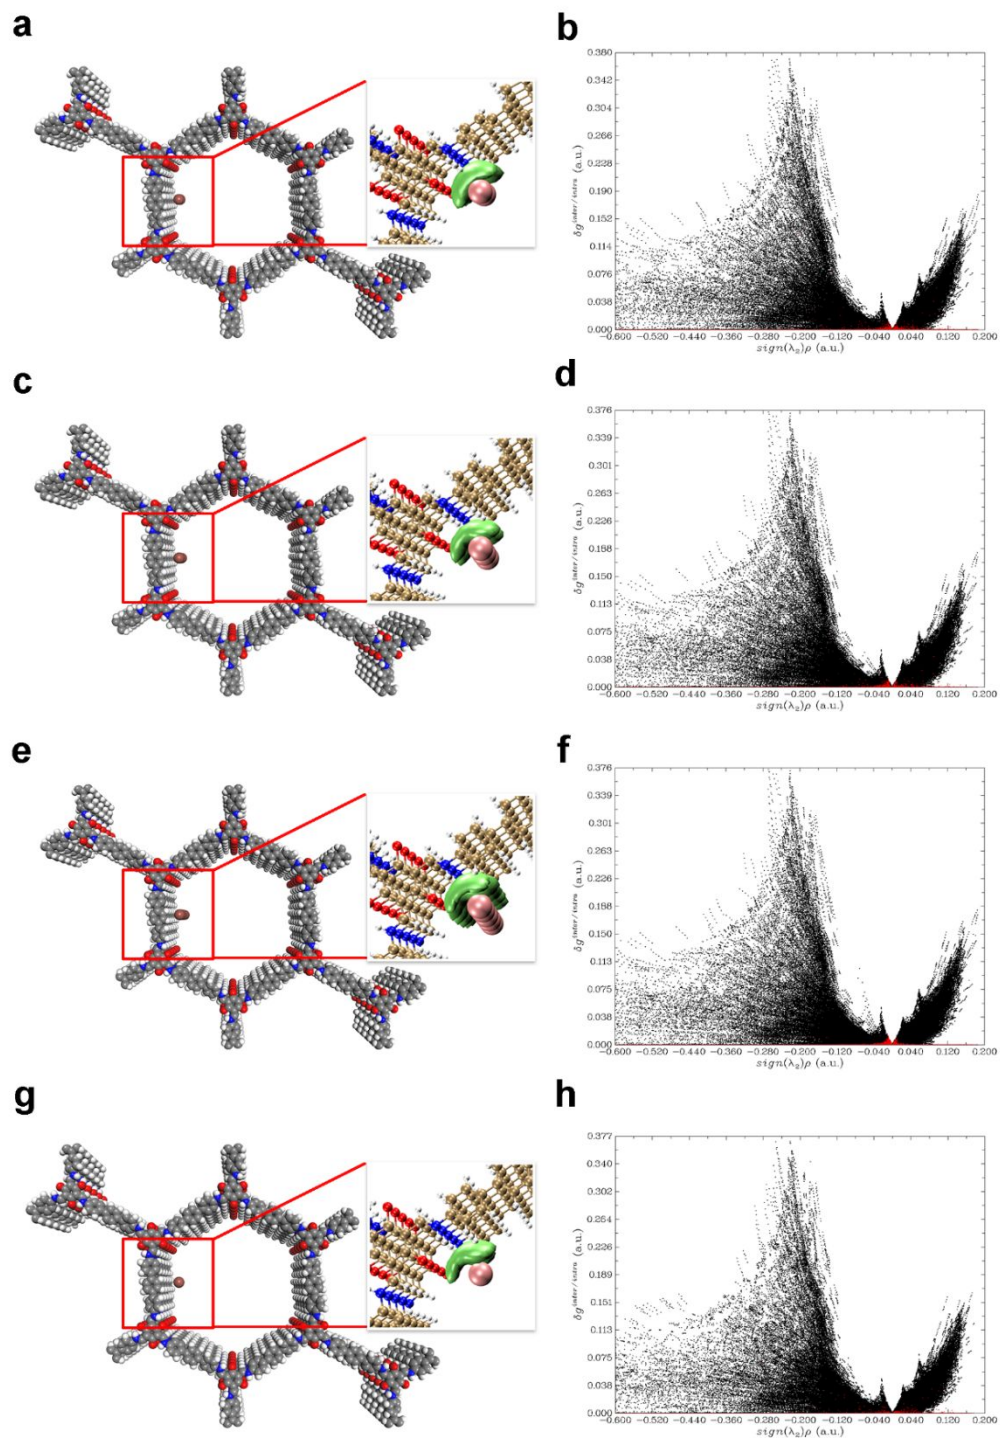

**Figure S11.** Simulated characterization of the iodine species capturing sites (Tpg) and IGM Scatter plot of COF-TpgBD. (a, b)  $I_2$ ; (c, d)  $I_3^-$ ; (e, f)  $I_5^-$ ; (g, h)  $I^+$ .

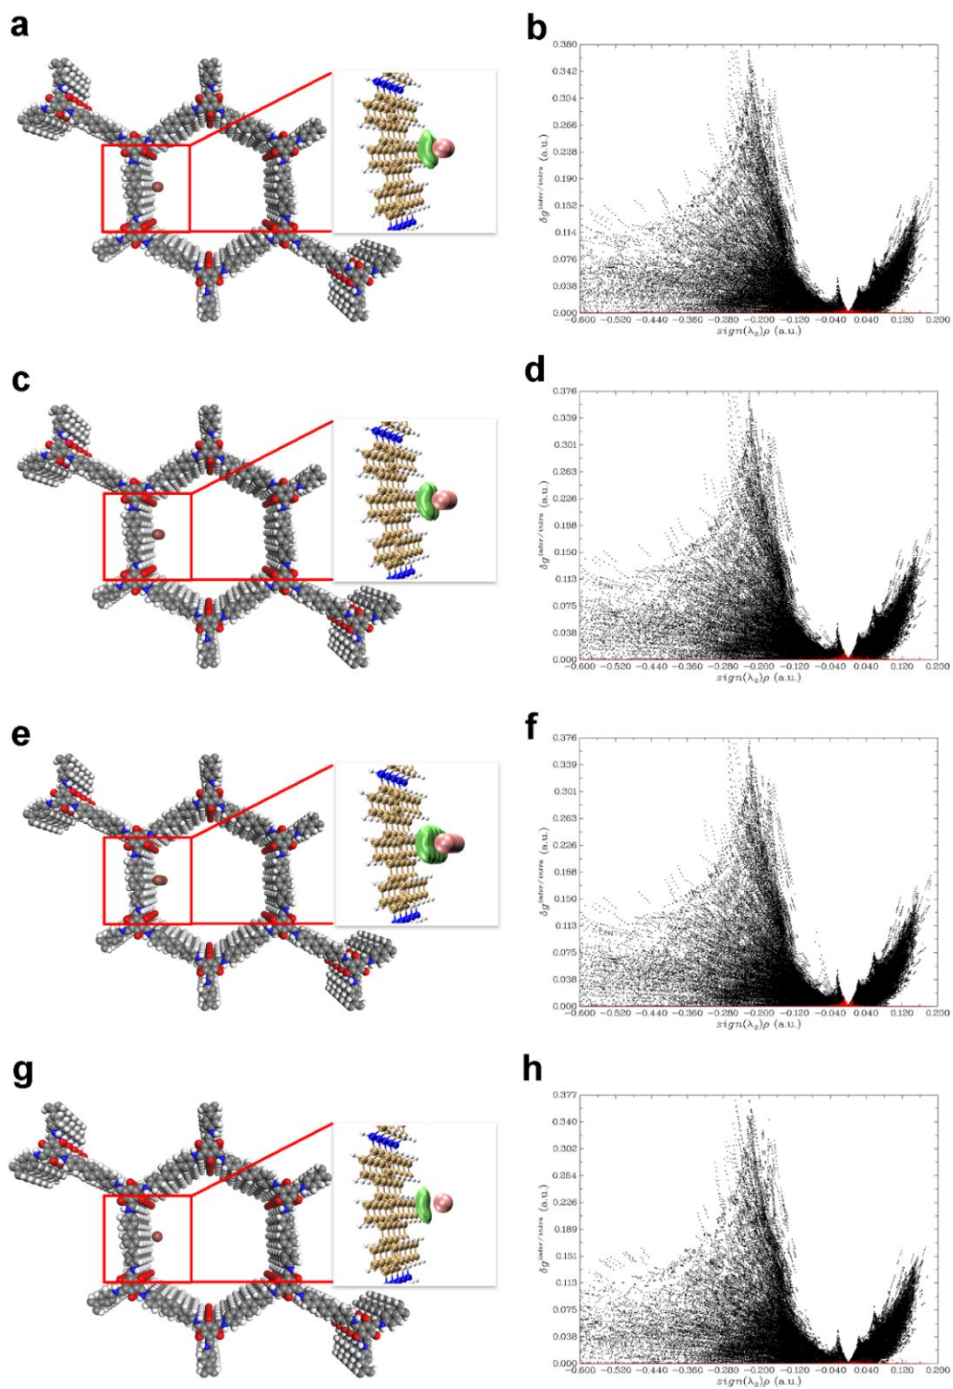

**Figure S12.** Simulated characterization of the iodine species capturing sites (Tpg) and IGM Scatter plot of CCOFs. (a, b)  $I_2$ ; (c, d)  $I_3^-$ ; (e, f)  $I_5^-$ ; (g, h)  $I^+$ .

Table S1. The pore properties of COF-TpgDB, COF-TpgBD and COF-TpgTd

| sample    | $S_{\text{BET}}/\text{m}^2\text{g}^{-1}$ | proe size/nm | pore volume/ccg <sup>-1</sup> |
|-----------|------------------------------------------|--------------|-------------------------------|
| COF-TpgDB | 209.6                                    | 6.8          | 0.36                          |
| COF-TpgBD | 217.9                                    | 8.3          | 0.46                          |
| COF-TpgTd | 303.6                                    | 9.9          | 0.75                          |

Table S2 Iodine uptake of different adsorbents

| Adsorbent                   | Iodine uptake (g/g) | Ref. | Adsorbent             | Iodine uptake (g/g) | Ref |
|-----------------------------|---------------------|------|-----------------------|---------------------|-----|
| TPB-DMTP                    | 6.26                | 1    | PAF-24                | 2.76                | 20  |
| TJNU-201                    | 5.62                | 2    | TTA-TFB               | 2.76                | 1   |
| BTT-TAPT                    | 5.47                | 3    | COF-TpgDB             | 2.75                | -   |
| TPT-BD-COF                  | 5.43                | 4    | PAF-23                | 2.71                | 20  |
| TTA-TTB                     | 4.95                | 1    | NAPOP-4               | 2.65                | 21  |
| P-TzTz                      | 4.94                | 5    | PAF-25                | 2.6                 | 20  |
| TTPPA                       | 4.9                 | 6    | COP2 <sup>++</sup>    | 2.58                | 22  |
| SIOC-COF-7                  | 4.81                | 7    | Ca1P <sub>3</sub> -Li | 2.48                | 9   |
| ETTA-TPA                    | 4.79                | 8    | NAPOP-3               | 2.41                | 21  |
| Ca1POF-1                    | 4.77                | 9    | NAPOP-2               | 2.39                | 21  |
| COF-DL229                   | 4.7                 | 10   | Azo-Trip              | 2.38                | 23  |
| ETTA-TPA                    | 4.7                 | 8    | BDP-CPP-2             | 2.23                | 18  |
| TPT-DHBD <sub>25</sub> -COF | 4.65                | 4    | SCMP-2                | 2.22                | 24  |
| TTPB                        | 4.43                | 11   | NRPP-2                | 2.22                | 25  |
| TPT-DHBD <sub>50</sub> -COF | 4.3                 | 4    | Ca1P4                 | 2.2                 | 9   |



|                             |      |    |                          |      |    |
|-----------------------------|------|----|--------------------------|------|----|
| TPT-DHBD <sub>75</sub> -COF | 4.12 | 4  | COP1 <sup>++</sup>       | 2.12 | 22 |
| Ca1POFs                     | 4.06 | 12 | FCMP-600-2               | 2.09 | 26 |
| TDPDB                       | 3.93 | 13 | CMPN-3                   | 2.08 | 27 |
| TPT-DHBD-COF                | 3.88 | 4  | NAPOP-1                  | 2.06 | 21 |
| POP-2                       | 3.82 | 14 | NiP-CMP                  | 2.02 | 28 |
| TFBCz-PDA                   | 3.69 | 1  | COF-TpgBD                | 1.81 | -  |
| POP-1                       | 3.57 | 14 | TTPT                     | 1.77 | 29 |
| Ca1POF-3                    | 3.53 | 9  | $\{[(ZnI_2)_3(tpt)_2]\}$ | 1.73 | 30 |
| HCOFs-4                     | 3.5  | 15 | COF-TpgTd                | 1.66 | -  |
| SCMP-II                     | 3.45 | 16 | MFM-300(Sc)              | 1.54 | 31 |
| HCOFs-2                     | 3.2  | 15 | HMTI-1                   | 1.5  | 32 |
| TTDAB                       | 3.13 | 11 | MFM-300(Fe)              | 1.29 | 31 |
| Ca1P4_Li                    | 3.12 | 9  | ZIF-8                    | 1.25 | 33 |
| Tm-MTDAB                    | 3.04 | 11 | MFM-300(In)              | 1.16 | 31 |
| HCOFs-3                     | 3    | 15 | CMPN-2                   | 1.1  | 27 |
| AzoPPN                      | 2.9  | 17 | $Zr_6O_4(OH)_4(sdc)_6$   | 1.07 | 21 |
| HCOF-1                      | 2.9  | 15 | $Zn_3(DL-lac)_2(pybz)_2$ | 1.01 | 34 |
| BDP-CPP-1                   | 2.83 | 18 | HMTI-2                   | 1    | 30 |
| $Zr_6O_4(OH)_4(peb)_6$      | 2.79 | 19 | Ag-MOR                   | 0.28 | 35 |

## Computational Section

The distant of C=O...I<sub>2</sub>, >NH...I<sub>2</sub> and the Ph...I<sub>2</sub> of COF-TpgBD and COF-TpgTd are 3.48, 3.78, 3.50, 3.42, 3.62 and 3.41 Å (Figure S9a, S10a, S11a and S12a), respectively. The average  $\delta g^{inter}$  value of I<sub>2</sub> at the Tpg and DB adsorption site of COF-TpgBD and COF-TpgTd are 0.09, 0.07, 0.09 and 0.08 (Figure S9b, S10b, S11b and S12b), respectively.

The distant of C=O...I<sub>3</sub><sup>-</sup>, >NH...I<sub>3</sub><sup>-</sup> and the Ph...I<sub>3</sub><sup>-</sup> of COF-TpgBD and COF-

TpgTd are 3.50, 3.04, 3.83, 3.44, 3.22 and 3.71 Å (Figure S9c, S10c, S11c and S12c), respectively. The average  $\delta g^{\text{inter}}$  value of I<sub>2</sub> at the Tpg and DB adsorption site of COF-TpgBD and COF-TpgTd are 0.09, 0.12, 0.10 and 0.09 (Figure S9d, S10d, S11d and S12d), respectively.

The distant of C=O...I<sub>5</sub><sup>-</sup>, >NH...I<sub>5</sub><sup>-</sup> and the Ph...I<sub>5</sub><sup>-</sup> of COF-TpgBD and COF-TpgTd are 3.50, 3.05, 3.83, 3.44, 3.24 and 3.71 Å (Figure S9e, S10e, S11e and S12e), respectively. The average  $\delta g^{\text{inter}}$  value of I<sub>2</sub> at the Tpg and DB adsorption site of COF-TpgBD and COF-TpgTd are 0.09, 0.12, 0.10 and 0.09 (Figure S9f, S10f, S11f and S12f), respectively.

The distant of C=O...I<sup>+</sup>, >NH...I<sup>+</sup> and the Ph...I<sup>+</sup> of COF-TpgBD and COF-TpgTd are 3.33, 3.56, 3.28, 3.43, 3.52 and 3.15 Å (Figure S9g, S10g, S11g and S12g), respectively. The average  $\delta g^{\text{inter}}$  value of I<sub>2</sub> at the Tpg and DB adsorption site of COF-TpgBD and COF-TpgTd are 0.10, 0.09, 0.09 and 0.11 (Figure S9h, S10h, S11h and S12h), respectively.

## References

- 1 Wang, P.; Xu, Q.; Li, Z. P.; Jiang, W. M.; Jiang, Q. H.; Jiang, D. L., Exceptional Iodine Capture in 2D Covalent Organic Frameworks. *Adv. Mater.* **2018**, 30 (29).
- 2 Li, J. H.; Zhang, H. X.; Zhang, L. Y.; Wang, K.; Wang, Z. K.; Liu, G. Y.; Zhao, Y. L.; Zeng, Y. F., Two-dimensional covalent-organic frameworks for ultrahigh iodine capture. *J. Mater. Chem. A* **2020**, 8 (19), 9523-9527.

3. Pan, X. W.; Qin, X. H.; Zhang, Q. H.; Ge, Y. S.; Ke, H. Z.; Cheng, G. E., N- and S-rich covalent organic framework for highly efficient removal of indigo carmine and reversible iodine capture. *Micropor. Mesopor. Mat.* **2020**, 296.
4. Guo, X. H.; Tian, Y.; Zhang, M. C.; Li, Y.; Wen, R.; Li, X.; Li, X. F.; Xue, Y.; Ma, L. J.; Xia, C. Q.; Li, S. J., Mechanistic Insight into Hydrogen-Bond-Controlled Crystallinity and Adsorption Property of Covalent Organic Frameworks from Flexible Building Blocks. *Chem. Mater.* **2018**, 30 (7), 2299-2308.
5. Pan, X. W.; Ding, C. H.; Zhang, Z. M.; Ke, H. Z.; Cheng, G. E., Functional porous organic polymer with high S and N for reversible iodine capture. *Micropor. Mesopor. Mat.* **2020**, 300.
6. Geng, T. M.; Zhu, Z. M.; Zhang, W. Y.; Wang, Y., A nitrogen-rich fluorescent conjugated microporous polymer with triazine and triphenylamine units for high iodine capture and nitro aromatic compound detection. *J. Mater. Chem. A.* **2017**, 5 (16), 7612-7617.
7. Yin, Z. J.; Xu, S. Q.; Zhan, T. G.; Qi, Q. Y.; Wu, Z. Q.; Zhao, X., Ultrahigh volatile iodine uptake by hollow microspheres formed from a heteropore covalent organic framework. *Chem. Commun.* **2017**, 53 (53), 7266-7269.
8. Ascherl, L.; Sick, T.; Margraf, J. T.; Lapidus, S. H.; Calik, M.; Hettstedt, C.; Karaghiosoff, K.; Doblinger, M.; Clark, T.; Chapman, K. W.; Auras, F.; Bein, T., Molecular docking sites designed for the generation of highly crystalline covalent organic frameworks. *Nat. Chem.* **2016**, 8 (4), 310-316.
9. Shetty, D.; Raya, J.; Han, D. S.; Asfari, Z.; Olsen, J. C.; Trabolsi, A., Lithiated Polycalix[4]arenes for Efficient Adsorption of Iodine from Solution and Vapor Phases. *Chem.*

*Mater.* **2017**, 29 (21), 8968-8972.

10. Wang, C.; Wang, Y.; Ge, R. L.; Song, X. D.; Xing, X. Q.; Jiang, Q. K.; Lu, H.; Hao, C.; Guo, X. W.; Gao, Y. A.; Jiang, D. L., A 3D Covalent Organic Framework with Exceptionally High Iodine Capture Capability. *Chem-Eur. J.* **2018**, 24 (3), 585-589.

11. Geng, T. M.; Ye, S. N.; Zhu, Z. M.; Zhang, W. Y., Triazine-based conjugated microporous polymers with N,N,N',N'-tetraphenyl-1,4-phenylenediamine, 1,3,5-tris(diphenylamino)benzene and 1,3,5-tris[(3-methylphenyl)-phenylamino]benzene as the core for high iodine capture and fluorescence sensing of o-nitrophenol. *J. Mater. Chem. A.* **2018**, 6 (6), 2808-2816.

12. Su, K. Z.; Wang, W. J.; Li, B. B.; Yuan, D. Q., Azo-Bridged Calix[4]resorcinarene-Based Porous Organic Frameworks with Highly Efficient Enrichment of Volatile Iodine. *ACS Sustain. Chem. Eng.* **2018**, 6 (12), 17402-17409.

13. Geng, T. M.; Liu, M.; Zhang, C.; Hu, C.; Xia, H. Y., The preparation of covalent triazine-based framework via Friedel-Crafts reaction of 2,4,6-trichloro-1,3,5-triazine with N,N'-diphenyl-N,N'-di(m-tolyl)benzidine for capturing and sensing to iodine. *Polym. Advan. Technol.* **2020**, 31 (6), 1388-1394.

14. Qian, X.; Wang, B.; Zhu, Z. Q.; Sun, H. X.; Ren, F.; Mu, P.; Ma, C. H.; Liang, W. D.; Li, A., Novel N-rich porous organic polymers with extremely high uptake for capture and reversible storage of volatile iodine. *J. Hazard. Mater.* **2017**, 338, 224-232.

15. Jiang, X. F.; Cui, X. Z.; Duncan, A. J. E.; Li, L.; Hughes, R. P.; Staples, R. J.; Alexandrov, E. V.; Proserpio, D. M.; Wu, Y. Y.; Ke, C. F., Topochemical Synthesis of Single-Crystalline Hydrogen-Bonded Cross-Linked Organic Frameworks and Their Guest-Induced

- Elastic Expansion. *J. Am. Chem. Soc.* **2019**, 141 (27), 10915-10923.
16. Qian, X.; Zhu, Z. Q.; Sun, H. X.; Ren, F.; Mu, P.; Liang, W. D.; Chen, L. H.; Li, A., Capture and Reversible Storage of Volatile Iodine by Novel Conjugated Microporous Polymers Containing Thiophene Units. *ACS Appl. Mater. Inter.* **2016**, 8 (32), 21063-21069.
17. Li, H.; Ding, X. S.; Han, B. H., Porous Azo-Bridged Porphyrin-Phthalocyanine Network with High Iodine Capture Capability. *Chem-Eur. J.* **2016**, 22 (33), 11863-11868.
18. Zhu, Y. L.; Ji, Y. J.; Wang, D. G.; Zhang, Y.; Tang, H.; Jia, X. R.; Song, M.; Yu, G. P.; Kuang, G. C., BODIPY-based conjugated porous polymers for highly efficient volatile iodine capture. *J. Mater. Chem. A.* **2017**, 5 (14), 6622-6629.
19. Marshall, R. J.; Griffin, S. L.; Wilson, C.; Forgan, R. S., Stereoselective Halogenation of Integral Unsaturated C-C Bonds in Chemically and Mechanically Robust Zr and Hf MOFs. *Chem-Eur. J.* **2016**, 22 (14), 4870-4877.
20. Yan, Z. J.; Yuan, Y.; Tian, Y. Y.; Zhang, D. M.; Zhu, G. S., Highly Efficient Enrichment of Volatile Iodine by Charged Porous Aromatic Frameworks with Three Sorption Sites. *Angew. Chem. Int. Edit.* **2015**, 54 (43), 12733-12737.
21. Weng, J. Y.; Xu, Y. L.; Song, W. C.; Zhang, Y. H., Tuning the Adsorption and Fluorescence Properties of Amino-Linked Porous Organic Polymers through N-Heterocyclic Group Decoration. *J. Polym. Sci. Pol. Chem.* **2016**, 54 (12), 1724-1730.
22. Das, G.; Prakasam, T.; Nuryyeva, S.; Han, D. S.; Abdel-Wahab, A.; Olsen, J. C.; Polychronopoulou, K.; PlatasIglesias, C.; Ravaux, F.; Jouiad, M.; Trabolosi, A., Multifunctional redox-tuned viologen-based covalent organic polymers. *J. Mater. Chem. A.* **2016**, 4 (40), 15361-15369.

23. Dang, Q. Q.; Wang, X. M.; Zhan, Y. F.; Zhang, X. M., An azo-linked porous triptycene network as an absorbent for CO<sub>2</sub> and iodine uptake. *Polym Chem-Uk*. **2016**, 7 (3), 643-647.
24. Ren, F.; Zhu, Z. Q.; Qian, X.; Liang, W. D.; Mu, P.; Sun, H. X.; Liu, J. H.; Li, A., Novel thiophene-bearing conjugated microporous polymer honeycomb-like porous spheres with ultrahigh iodine uptake. *Chem. Commun.* **2016**, 52 (63), 9797-9800.
25. Abdelmoaty, Y. H.; Tessema, T. D.; Choudhury, F. A.; El-Kadri, O. M.; El-Kaderi, H. M., Nitrogen-Rich Porous Polymers for Carbon Dioxide and Iodine Sequestration for Environmental Remediation. *Acs. Appl. Mater. Inter.* **2018**, 10 (18), 16049-16058.
26. Li, G. Y.; Yao, C.; Wang, J. K.; Xu, Y. H., Synthesis of tunable porosity of fluorine-enriched porous organic polymer materials with excellent CO<sub>2</sub>, CH<sub>4</sub> and iodine adsorption. *Sci. Rep-Uk* **2017**, 7.
27. Shi, Q.; Sun, H. X.; Yang, R. X.; Zhu, Z. Q.; Liang, W. D.; Tan, D. Z.; Yang, B. P.; Li, A.; Deng, W. Q., Synthesis of conjugated microporous polymers for gas storage and selective adsorption. *J. Mater. Sci.* **2015**, 50 (19), 6388-6394.
28. Sigen, A.; Zhang, Y. W.; Li, Z. P.; Xia, H.; Xue, M.; Liu, X. M.; Mu, Y., Highly efficient and reversible iodine capture using a metalloporphyrin-based conjugated microporous polymer. *Chem. Commun.* **2014**, 50 (62), 8495-8498.
29. Geng, T. M.; Zhang, W. Y.; Zhu, Z. M.; Chen, G. F.; Ma, L. Z.; Ye, S. N.; Niu, Q. Y., A covalent triazine-based framework from tetraphenylthiophene and 2,4,6-trichloro-1,3,5-triazine motifs for sensing o-nitrophenol and effective I<sub>2</sub> uptake. *Polym Chem-Uk* **2018**, 9 (6), 777-784.
30. Brunet, G.; Safin, D. A.; Aghaji, M. Z.; Robeyns, K.; Korobkov, I.; Woo, T. K.;

Murugesu, M., Stepwise crystallographic visualization of dynamic guest binding in a nanoporous framework. *Chem. Sci.* **2017**, 8 (4), 3171-3177.

31. Zhang, X. R.; da Silva, I.; Godfrey, H. G. W.; Callear, S. K.; Sapchenko, S. A.; Cheng, Y. Q.; Vitorica-Yrezabal, I.; Frogley, M. D.; Cinque, G.; Tang, C. C.; Giacobbe, C.; Dejoie, C.; Rudic, S.; Ramirez-Cuesta, A. J.; Denecke, M. A.; Yang, S. H.; Schroder, M., Confinement of Iodine Molecules into Triple-Helical Chains within Robust Metal-Organic Frameworks. *J. Am. Chem. Soc.* **2017**, 139 (45), 16289-16296.

32. Hashemi, L.; Morsali, A., Reversible crystal-to-crystal transformation in nano-porous three-dimensional lead(II) MOFs; study of solvent attendance on iodide adsorption affinity. *Crystengcomm.* **2012**, 14 (24), 8349-8351.

33. Sava, D. F.; Rodriguez, M. A.; Chapman, K. W.; Chupas, P. J.; Greathouse, J. A.; Crozier, P. S.; Nenoff, T. M., Capture of Volatile Iodine, a Gaseous Fission Product, by Zeolitic Imidazolate Framework-8. *J. Am. Chem. Soc.* **2011**, 133 (32), 12398-12401.

34. Zeng, M. H.; Wang, Q. X.; Tan, Y. X.; Hu, S.; Zhao, H. X.; Long, L. S.; Kurmoo, M., Rigid Pillars and Double Walls in a Porous Metal-Organic Framework: Single-Crystal to Single-Crystal, Controlled Uptake and Release of Iodine and Electrical Conductivity. *J. Am. Chem. Soc.* **2010**, 132 (8), 2561.

35. Ru-Xin, Yao, Xin. A Luminescent Zinc(II) Metal-Organic Framework (MOF) with Conjugated  $\pi$ -Electron Ligand for High Iodine Capture and Nitro-Explosive Detection. *J. Inorganic Chemistry*, 2016.
